# Supplementary material for: Applications and Prospects of CRISPR/Cas9-Mediated Base Editing in Plant Breeding
Source: MDPI journal article supplement (doi:10.3390/cimb45020059), 2023-01-19
Supplement: s1 [file s1]

Table S1. Applications of base editing in plants.

| Method | Plant species | Target gene                                                                       | Gene function                                                                                                   | Base editor construct       | Trait improvement                                     | Mutant base sites                                                                                                           | Reference |
|--------|---------------|-----------------------------------------------------------------------------------|-----------------------------------------------------------------------------------------------------------------|-----------------------------|-------------------------------------------------------|-----------------------------------------------------------------------------------------------------------------------------|-----------|
| ABE    | Rice          | <i>sgOs-siteG1</i><br><i>sgOs-site2</i><br><i>sgOs-site3</i><br><i>sgOs-site4</i> |                                                                                                                 | ABE7.10-nSpCas9-NGv1        | -                                                     | -                                                                                                                           | [19]      |
| CBE    | Rice          | <i>OsSBEIIb</i><br><i>OsPDS</i>                                                   | <i>OsPDS</i> : encodes a phytoene desaturase<br><i>OsSBEIIb</i> : encodes a starch branching enzyme IIb in rice | PCXUN-be3                   | -                                                     | <i>OsPDS</i> :<br>G8→A8 G10→A10 G8→C8<br><i>OsSBEIIb</i> :<br>G5,6→A5,6 G6→A6<br>G5→A5 G5→C5 G6→C6<br>G6→T6 G5→T5 G5,6→T5,6 | [60]      |
| CBE    | Rice          | <i>NRT1.1B</i><br><i>SLR1</i>                                                     | <i>SLR1</i> encodes a <i>DELLA</i> protein<br><i>NRT1.1B</i> encodes a nitrogen transporter                     | APOBEC1-XTEN-Cas9(D10A)-NLS | High nitrogen Use efficiency and Reduced plant height | <i>NRT1.1B</i> :<br>C7→T7(T327M)<br><i>SLR1</i> :<br>C6→T6 (S97L)                                                           | [61]      |

|       |                        |                                                                                                                                                              |                                                                                                                                                         |            |                               |                                                                                                                                                                                                                                                             |      |
|-------|------------------------|--------------------------------------------------------------------------------------------------------------------------------------------------------------|---------------------------------------------------------------------------------------------------------------------------------------------------------|------------|-------------------------------|-------------------------------------------------------------------------------------------------------------------------------------------------------------------------------------------------------------------------------------------------------------|------|
| GhBE3 | Tetraploid cotton      | <i>GhCLA</i><br><i>GhPEBP</i>                                                                                                                                | <i>GhCLA</i> functions in chloroplast development. <i>GhPEBP</i> participates in the multiplex-branch                                                   | GhBE3      | -                             | -                                                                                                                                                                                                                                                           | [61] |
| CBE   | Rice<br>Wheat<br>Maize | RICE: <i>OsCDC48</i><br><i>OsNRT1.1B</i><br><i>OsSPL14</i><br>Wheat:<br><i>TaLOX2-S1</i><br><i>TaLOX2-S2</i><br><i>TaLOX2-S3</i><br>Maize:<br><i>ZmCENH3</i> | <i>OsCDC48</i> regulates senescence and cell death. <i>NRT1.1B</i> encodes a nitrogen transporter. <i>OsSPL14</i> controls grain yield and grain number | pnCas9-PBE | Reduced senescence and death. | <i>OsCDC48</i> :<br>C3→T3 C7→T7 C7→T7<br>C8→T8 C3,4→T3,4<br>C7,8→T7,8<br>C3,4,7→T3,4,7<br><i>OsNRT1.1B</i> :<br>C4→T4 C7→T7<br><i>OsSPL14</i> :<br>C3→T3 C6→T6<br><i>TaLOX2</i> :C3,6,9→T3,6,9<br>C3→T3<br><i>ZmCENH3</i> :C3→T3 C4→T4<br>C5→T5 C7→T7 C8→T8 | [64] |
| ABE   | Rice                   | <i>OsALS1</i><br><i>OsTubA2</i><br><i>OsGS1</i><br><i>OsACC</i>                                                                                              | <i>OsALS</i> encodes acetolactate synthase,<br><br><i>OsTubA2</i> : a novel                                                                             | TadA9      | Herbicide resistance          | <i>OsALS1</i> : A10→G10 (S627G)<br><i>OsTubA2</i> :<br>T11→C11(M268T)<br><i>OsGS1</i> : A11→G11 (H249Y)                                                                                                                                                     | [65] |

|     |        |                                                  |                                                                                                                |                                        |                                                     |                                                                                                                                                                                                                                        |      |
|-----|--------|--------------------------------------------------|----------------------------------------------------------------------------------------------------------------|----------------------------------------|-----------------------------------------------------|----------------------------------------------------------------------------------------------------------------------------------------------------------------------------------------------------------------------------------------|------|
|     |        |                                                  | artificial rice<br>germplasm resistant<br>to dinitroaniline<br>herbicides was<br>produced                      |                                        |                                                     | <i>OsACC</i> : T12→C12 (C2186K)                                                                                                                                                                                                        |      |
|     |        |                                                  | <i>GS1</i> gene is involved<br>in regulating<br>glutamine synthesis<br>in old leaves                           |                                        |                                                     |                                                                                                                                                                                                                                        |      |
|     |        |                                                  | <i>ACC</i> : Herbicide<br>tolerance                                                                            |                                        |                                                     |                                                                                                                                                                                                                                        |      |
| CBE | tomato | <i>SIDDB1</i><br><i>SIDET1</i><br><i>SICYC-B</i> | <i>SIDDB1</i> , <i>SIDET1</i> and<br><i>SICYC-B</i><br>: Responsible for the<br>accumulation of<br>carotenoids | PDicAID-nCas9<br>-CDAUGI-LVA-<br>NptII | Carotenoids<br>accumulate<br>more tomato<br>strains | <i>SIDDB1</i> : G3→A3 A312T<br>G9→C9 (D310H)<br>G3→A3 and<br>G9→C9(D310H) and<br>(A312T)<br><i>SIDET1</i> : G2,3→T2,3 and<br>C9→T9 (P479F and A481V)<br>G2,3→T2,3 (P479F)<br><i>SICYC-B</i> : G3,4→A3,4 STOP<br>codon<br>G6→A6 (M117I) | [66] |

---

|     |             |                    |                                                                                                                                                                             |         |                                                                   |                                                                              |      |
|-----|-------------|--------------------|-----------------------------------------------------------------------------------------------------------------------------------------------------------------------------|---------|-------------------------------------------------------------------|------------------------------------------------------------------------------|------|
| ABE | Strawberry  | <i>FvebZIPs1.1</i> | the conserved uORF of the strawberry transcription factor gene <i>FvebZIPs1.1</i>                                                                                           | A3A-PBE | Utilize bases<br>Edit fine-tune the sugar content of strawberries | -                                                                            | [67] |
| CBE | Water melon | <i>ALS</i>         | Acetyl lactate synthase ( <i>ALS</i> ) catalyzes the conversion of pyruvate to acetolactate during plant growth, leading to the biosynthesis of branched-chain amino acids. | CBE3    | herbicide-resistant                                               | C7C8→T7C8(P190S)                                                             | [68] |
| CBE | Water melon | <i>ALS</i>         | Herbicide tolerance                                                                                                                                                         | pBSE901 | Herbicide-resistant watermelon strains                            | C7C8→T7C8 (P190S)<br>(Herbicide resistant)<br>C7C8→T7T8 (P190L)<br>(Unknown) | [68] |

---

---

|     |              |               |                     |                                                         |                                  |                                                                                                                                                                                                                                                                                                                                                                                                                                            |      |
|-----|--------------|---------------|---------------------|---------------------------------------------------------|----------------------------------|--------------------------------------------------------------------------------------------------------------------------------------------------------------------------------------------------------------------------------------------------------------------------------------------------------------------------------------------------------------------------------------------------------------------------------------------|------|
| CBE | Oilseed rape | <i>BnALS1</i> | Herbicide tolerance | pnCas9-PBE                                              | Benzisulfuron Resistant rapeseed | C6,7→T6,7 (P197S)<br>(Herbicide resistant)<br>C6,7,8→T6,7,8 (P197F)<br>(Unknown)                                                                                                                                                                                                                                                                                                                                                           | [68] |
| CBE | Rice         | <i>ALS</i>    | Herbicide tolerance | H-BE3- <i>OsALS</i> -P171<br>pH-BE3- <i>OsALS</i> -G628 | Herbicide resistance             | H-BE3- <i>OsALS</i> -P171:<br>C6,7→T6,7 (P171S)<br>C6→T6 and C7→G7<br>(P171A)<br>C6,7→T6,7 and C8→A8<br>(P171Y)<br>C6,7,8→T6,7,8 (P171F)<br>C6,7,8,9,10→T6,7,8,9,10<br>(P171F and R172C)<br>pH-BE3- <i>OsALS</i> -G628:<br>G5,6,7→A5,6,7:<br>(G628E/G629S)<br>Combinations of edits<br>generated by simultaneous<br>editing of <i>OsALS</i> -P171<br>and <i>OsALS</i> -G628:<br>G5,6,7→A5,6,7 and<br>C6,7,8→T6,7,8:<br>(P171F/G628E/G629S) | [69] |

---

---

|     |      |                                                                      |                                                                                                                                |                                                             |                         |                                                                                             |      |
|-----|------|----------------------------------------------------------------------|--------------------------------------------------------------------------------------------------------------------------------|-------------------------------------------------------------|-------------------------|---------------------------------------------------------------------------------------------|------|
| ABE | Rice | <i>OsSPL14</i><br><i>OsSPL17</i><br><i>OsSPL16</i><br><i>OsSPL18</i> | They control grain<br>yield<br>and grain number                                                                                | VQR-Cas9<br>(D10A)/<br>VRER-Cas9<br>(D10A)                  | High yield              | -                                                                                           | [76] |
| CBE | Rice | <i>OsALS</i><br><i>OsEPSPS</i>                                       | <i>ALS</i> : Herbicide<br>tolerance<br><i>OsEPSPS</i> ; encodes<br>a key enzyme in the<br>synthesis of aromatic<br>amino acids | A3A/Y130F-<br>CBE-V01<br>A3A/Y130F-<br>nCas9-NG-<br>CBE-V01 | Herbicide<br>resistance | <i>OsALS</i> :<br>G5→A5 (D349N)<br>G12→A12 (D550N)<br><i>OsEPSPS</i> :<br>C7,8→T7,8 (P173L) | [80] |

---

---

|     |      |                                               |                                           |                   |                                                                                                                      |                                                                                                                                                                                                                                                                                                                                                                                  |      |
|-----|------|-----------------------------------------------|-------------------------------------------|-------------------|----------------------------------------------------------------------------------------------------------------------|----------------------------------------------------------------------------------------------------------------------------------------------------------------------------------------------------------------------------------------------------------------------------------------------------------------------------------------------------------------------------------|------|
| CBE | Rice | <i>OsSPL14</i><br><i>OsSPL16</i>              | They control grain yield and grain number | A3A/Y130F-CBE-V01 | elevated expression of <i>OsSPL14</i> and <i>OsSPL16</i> was detected in these edited lines                          | These edits had destroyed the <i>OsMIR156</i> binding sites in the mRNAs of <i>OsSPL14</i> and <i>OsSPL16</i> . The M0-1979-6-1 has a homozygous deletion at the <i>OsSPL14</i> -sgRNA01 site and biallelic base editing at the <i>OsSPL16</i> -sgRNA01 site. These mutations also abolished the <i>OsMIR156</i> binding sites in the mRNAs of <i>OsSPL14</i> and <i>OsSPL16</i> | [80] |
| CBE | Rice | <i>OsGS3</i><br><i>OsGW2</i><br><i>OsGN1a</i> | control grain yield                       | A3A/Y130FCBE-V01  | Increased particle length (due to <i>OsGS3</i> knockout) and particle width increase (due to knockout <i>OsGW2</i> ) | <i>OsGS3</i> : W→STOP<br><i>OsGW2</i> : Q→STOP<br><i>OsGN1a</i> : Q→STOP                                                                                                                                                                                                                                                                                                         | [80] |

---

|     |                    |                                                                      |                                                                                 |                 |                           |                                                                                                           |      |
|-----|--------------------|----------------------------------------------------------------------|---------------------------------------------------------------------------------|-----------------|---------------------------|-----------------------------------------------------------------------------------------------------------|------|
| ABE | Rice               | <i>SLR1</i>                                                          | <i>SLR1</i> could block its GA-dependent degradation, making the plant dwarf    | pRABEsp-OsU6    | plant dwarf               | <i>SLR1</i> :<br>T6→C6 (V92A)                                                                             | [81] |
| ABE | Rice               | <i>OsSPL14</i><br><i>OsSPL17</i><br><i>OsSPL16</i><br><i>OsSPL18</i> | They control grain yield and grain number                                       | pRABEsp-OsU6sa  | High yield                | -                                                                                                         | [81] |
| ABE | Rice (Indica rice) | <i>Waxy</i>                                                          | <i>Waxy</i> genes ( <i>Waxy</i> ): control straight-chain precipitation in rice | pHPABE-7-esgRNA | amylose content decreased | transgenic Mutant 1 to 3 (MT1, MT2 and MT3)<br>MT1 A1246G(N247D)<br>MT2 A1634G(N306D)<br>MT3 A496G(Q128R) | [91] |



---

|     |      |           |                                                                       |                              |                  |                                                                                                                                                                                                                                                                                                                                                                   |      |
|-----|------|-----------|-----------------------------------------------------------------------|------------------------------|------------------|-------------------------------------------------------------------------------------------------------------------------------------------------------------------------------------------------------------------------------------------------------------------------------------------------------------------------------------------------------------------|------|
| CBE | Rice | <i>Wx</i> | <i>Waxy (Wx)</i> : control<br>straight-chain<br>precipitation in rice | PBETS1<br>PBE-TS2<br>PBE-TS3 | Low amylose rice | PBE-TS1:<br><i>Wxm5</i> :<br>C2,3,5→T2,3,5<br>(P124F and R125W)<br>PBE-TS2:<br><i>Wxm6</i> :<br>G6,7→A6,7(G159K)<br><i>Wxm7</i> :<br>G6→C6(G159A)<br><i>Wxm8</i> :<br>G1→A1 and G6→C6<br>(G159A and D161N)<br><i>Wxm9</i> :<br>G4→T4 and G6→A6<br>(G159E and V160F)<br>PBE-TS3:<br><i>Wxm10</i> :<br>C5,6→T5,6(T178I)<br><i>Wxm11</i> :<br>C5→G5 and C6→T6(T178S) | [92] |
|-----|------|-----------|-----------------------------------------------------------------------|------------------------------|------------------|-------------------------------------------------------------------------------------------------------------------------------------------------------------------------------------------------------------------------------------------------------------------------------------------------------------------------------------------------------------------|------|

---

---

|     |                |                                            |                                                                                                                                |                              |                                         |                                                                                                                                     |       |
|-----|----------------|--------------------------------------------|--------------------------------------------------------------------------------------------------------------------------------|------------------------------|-----------------------------------------|-------------------------------------------------------------------------------------------------------------------------------------|-------|
| CBE | Wheat          | <i>TaALS</i>                               | <i>TaALS</i> encodes acetolactate synthase, which functions in the biosynthesis of the branched amino acid.                    | A3A-PBE                      | Herbicide resistance                    | C7,8,9→T7,8,9 (P197F)                                                                                                               | [104] |
| CBE | Brassica napus | <i>BnALS1</i><br><i>/AA7</i><br><i>RGA</i> | <i>BnALS1</i> : strong resistance of sulfonylurea herbicides, <i>/AA7</i> , and <i>RGA</i> : plant dwarfing to varying degrees | A3A-PBE                      | Herbicide resistance<br>Dwarfed strains | <i>BnALS1</i> :<br>C7,8→T7,8 (P179F R180C)<br><i>/AA7</i> :<br>C3,4,6,7→T4,6,7 (P92F P92L)<br><i>RGA</i> .C3,4,7→T3,4,7 (P94L S95L) | [110] |
| CBE | Rice           | <i>Pi-d2</i>                               | <i>Pi-d2</i> : Rice fungus resistance gene                                                                                     | hAID*Δ-XTEN-Cas9n-NLS (rBE5) | Blast resistance                        | G4→A4(M441I)                                                                                                                        | [114] |

---

|     |      |                  |                                                                     |         |                                                                                                                                                                                                                                                       |                                                                   |       |
|-----|------|------------------|---------------------------------------------------------------------|---------|-------------------------------------------------------------------------------------------------------------------------------------------------------------------------------------------------------------------------------------------------------|-------------------------------------------------------------------|-------|
| CBE | Rice | <i>OsSWEET14</i> | <i>OsSWEET14</i> :<br>Susceptibility genes<br>for white leaf blight | eAFID-3 | the predictable<br>multi-nucleotide-<br>targeted deletions<br>generated<br>by AFID-3 outside<br>the TATA box in<br>the<br>effector-binding<br>element conferred<br>enhanced<br>resistance<br>to bacterial blight<br>without affecting<br>plant growth | AFID-3-induced<br>predictable<br>deletions in<br><i>OsSWEET14</i> | [120] |
| ABE | Rice | <i>OsTubA2</i>   | Rice $\alpha$ -tubulin gene<br><i>OsTubA2</i>                       | rBE14   | A new artificial<br>rice germplasm<br>resistant to<br>trifluraline and no<br>loss of adaptation<br>was obtained                                                                                                                                       | T7→C7(M268T)                                                      | [127] |

---

|     |        |                                |                                                                                                                       |                                                       |                      |                                                       |       |
|-----|--------|--------------------------------|-----------------------------------------------------------------------------------------------------------------------|-------------------------------------------------------|----------------------|-------------------------------------------------------|-------|
| CBE | Maize  | <i>ZmALS1</i><br><i>ZmALS2</i> | Acetyl lactate synthase ( <i>ALS</i> ): catalyzes the biosynthesis of branched-chain amino acids during plant growth. | NLS-APOBEC1-XTEN - nCas9(D10A)-UGI-SV40NLS (CT-nCas9) | Herbicide resistance | C7→T7 (P165S)<br>C7→G7 (P165A)<br>C7C8→T7G8 (P165W)   | [132] |
| CBE | Tomato | <i>ALS</i>                     | Acetyl lactate synthase ( <i>ALS</i> ): catalyzes the biosynthesis of branched-chain amino acids during plant growth. | pDeSpnCas9-NG-PmCDA1-UGI (Target-AID)                 | Herbicide-resistant  | C14→T14 (P186S)<br>C14→A14 (P186A)<br>C14→G14 (P186T) | [133] |

---

---

|     |               |                           |                                                                                                                                                                                                                                 |                         |                                                                                        |                                                                                                                                                                                                     |       |
|-----|---------------|---------------------------|---------------------------------------------------------------------------------------------------------------------------------------------------------------------------------------------------------------------------------|-------------------------|----------------------------------------------------------------------------------------|-----------------------------------------------------------------------------------------------------------------------------------------------------------------------------------------------------|-------|
| CBE | Apple<br>pear | <i>ALS</i> and <i>PDS</i> | <i>ALS</i> : Herbicide tolerance<br><i>PDS</i> : Carotenoid biosynthesis                                                                                                                                                        | pDenCas9_<br>PmCDA1_UGI | Anti-clonalulfuron and albino lines are obtained in pears.                             | <i>ALS</i> :<br>apple:<br>C12,13→T12,13:(P185L)<br>C11→T11(R186W)<br>pear: C14→T14<br>andC13→G13(P192C)<br>C13,14→T13,14 (P192F)<br><i>PDS</i> :<br>apple C17→T17 Q153STOP<br>pear C11→T11 Q353STOP | [134] |
| ABE | Arabidopsis   | <i>FT</i><br><i>PDS3</i>  | <i>FT</i> is an integrator factor and a key gene for regulating flowering pathways in plants<br><i>PDS</i> : Octahydroxycyclopentenolone dehydrogenase gene, which has the effect of protecting chlorophyll from photobleaching | pcABE7.10               | Transgenic Arabidopsis strains with late-flowering and albino phenotypes were obtained | <i>PDS</i> : A6→G6 Incorrect splicing of RNA transcripts<br><i>FT</i> : T7→C7 (Y85H)                                                                                                                | [135] |

---

|            |      |                                         |                                                                               |                                      |                      |                                                                           |       |
|------------|------|-----------------------------------------|-------------------------------------------------------------------------------|--------------------------------------|----------------------|---------------------------------------------------------------------------|-------|
| ABE        | Rice | <i>ACC</i>                              | <i>ACC</i> : Herbicide resistance                                             | Ubi-1-ecTadA-ecTadA*-nCas9-3xNLS     | Herbicide resistance | T7→C7 (C2186R)                                                            | [137] |
| STEME      | Rice | <i>OsACC</i>                            | Herbicide tolerance                                                           | APOBEC3A-ecTadA-ecTadA* nCas9 (D10A) | Herbicide resistance | P1927F<br>W2125C<br>S1866F<br>A1884P                                      | [138] |
| CBE<br>ABE | Rice | <i>OsACC</i>                            | herbicide resistance                                                          | eBE3<br>eCDA<br>eABE                 | Herbicide tolerance  | <i>OsACC-T1</i><br>T7→C7 (C2186R)<br>T13→C13 (C2186R)<br>A16→G16 (I1879V) | [139] |
| CBE        | Rice | <i>EPSPS</i><br><i>ALS</i><br><i>DL</i> | <i>EPSPS, ALS</i> :<br>Herbicide tolerance<br><i>DL</i> : drooping leaf genes | NGv1 (D10A)                          | Herbicide tolerance  | -                                                                         | [142] |
| CBE        | Rice | <i>EPSPS</i><br><i>ALS</i><br><i>DL</i> | Herbicide tolerance                                                           | Target-AID-NGv1 (D10A)               | Herbicide tolerance  | -                                                                         | [142] |

---

|     |        |              |                                                                                                                       |                                                   |                     |                                                 |       |
|-----|--------|--------------|-----------------------------------------------------------------------------------------------------------------------|---------------------------------------------------|---------------------|-------------------------------------------------|-------|
| CBE | Rice   | <i>ALS</i>   | Acetyl lactate synthase ( <i>ALS</i> ): catalyzes the biosynthesis of branched-chain amino acids during plant growth. | nCas9Os-PmCDA1At (Target-AID)                     | Herbicide-Resistant | C3→T3 (A96V)                                    | [144] |
| CBE | Tomato | <i>DELLA</i> | <i>DELLA</i> gene family: Regulation of gibberellin signaling in plants                                               | nCas9At-PmCDA1Hs<br>nCas9At-PmCDA1At (Target-AID) | -                   | nCas9At→PmCDA1Hs:<br>C1→T1(PtoL)<br>C3→G3(LtoV) | [144] |

---

---

|                  |        |                                                                   |                                                |                                          |                               |                                                                                                             |       |
|------------------|--------|-------------------------------------------------------------------|------------------------------------------------|------------------------------------------|-------------------------------|-------------------------------------------------------------------------------------------------------------|-------|
| CBE              | Tomato | <i>ERT1</i>                                                       | <i>ERT1</i> : regulate plant hormone signaling | nCas9At-PmCDA1At-2A                      | -                             | C5→T5(AtoV)<br>G5→C5andG3→A3<br>(VtoL)<br>G3→A3andG5→A5<br>(Vtol)<br>G3→C3andG5→A5<br>(Vtol)                | [144] |
| pDUBE1           | Rice   | <i>OsALS</i><br><i>OsACC</i>                                      | Herbicide tolerance                            | pDUBE1                                   | Herbicide tolerance           | C8,9,10→T8,9,10 (P171F)<br>A16→G16 (I1899V)                                                                 | [148] |
| CBE              | Rice   | <i>OsCERK1</i><br><i>OsSERK1</i><br><i>OsSERK2</i><br><i>ipa1</i> | Encodes receptor-like kinase.                  | rBE3<br>(APOBEC1-XTEN<br>-Cas9n-UGI-NLS) | Detect the efficiency of rBE3 | rBE3:<br><i>OsSERK1</i> G4→A4 (D428N)<br><i>OsSERK2</i> G6→A6 (D433N)<br>rBE4:<br><i>ipa1</i> C4→T4 (S918F) | [176] |
| -, not reported. |        |                                                                   |                                                |                                          |                               |                                                                                                             |       |

---

## Reference



19. Negishi, K., et al., *An adenine base editor with expanded targeting scope using SpCas9-NGv1 in rice*. Plant Biotechnol J, 2019. **17**(8): p. 1476-1478.
60. Li, J., et al., *Generation of Targeted Point Mutations in Rice by a Modified CRISPR/Cas9 System*. Mol Plant, 2017. **10**(3): p. 526-529.
61. Lu, Y. and J.K. Zhu, *Precise Editing of a Target Base in the Rice Genome Using a Modified CRISPR/Cas9 System*. Mol Plant, 2017. **10**(3): p. 523-525.
64. Zong, Y., et al., *Precise base editing in rice, wheat and maize with a Cas9-cytidine deaminase fusion*. Nat Biotechnol, 2017. **35**(5): p. 438-440.
65. Yan, D., et al., *High-efficiency and multiplex adenine base editing in plants using new TadA variants*. Mol Plant, 2021. **14**(5): p. 722-731.
66. Hunziker, J., et al., *Multiple gene substitution by Target-AID base-editing technology in tomato*. Sci Rep, 2020. **10**(1): p. 20471.
67. Xing, S., et al., *Fine-tuning sugar content in strawberry*. Genome Biol, 2020. **21**(1): p. 230.
68. Tian, S., et al., *Engineering herbicide-resistant watermelon variety through CRISPR/Cas9-mediated base-editing*. Plant Cell Rep, 2018. **37**(9): p. 1353-1356.
69. Zhang, R., et al., *Generating broad-spectrum tolerance to ALS-inhibiting herbicides in rice by base editing*. Sci China Life Sci, 2021. **64**(10): p. 1624-1633.
76. Hua, K., et al., *Genome Engineering in Rice Using Cas9 Variants that Recognize NG PAM Sequences*. Mol Plant, 2019. **12**(7): p. 1003-1014.
80. Ren, Q., et al., *Improved plant cytosine base editors with high editing activity, purity, and specificity*. Plant Biotechnol J, 2021. **19**(10): p. 2052-2068.
81. Hua, K., et al., *Precise A.T to G.C Base Editing in the Rice Genome*. Mol Plant, 2018. **11**(4): p. 627-630.
91. Huang, L., et al., *Creating novel Wx alleles with fine-tuned amylose levels and improved grain quality in rice by promoter editing using CRISPR/Cas9 system*. Plant Biotechnol J, 2020. **18**(11): p. 2164-2166.
92. Xu, Y., et al., *Fine-tuning the amylose content of rice by precise base editing of the Wx gene*. Plant Biotechnol J, 2021. **19**(1): p. 11-13.
104. Zong, Y., et al., *Efficient C-to-T base editing in plants using a fusion of nCas9 and human APOBEC3A*. Nat Biotechnol, 2018.
110. Cheng, H., et al., *Base editing with high efficiency in allotetraploid oilseed rape by A3A-PBE system*. Plant Biotechnol J, 2021. **19**(1): p. 87-97.
114. Ren, B., et al., *Improved Base Editor for Efficiently Inducing Genetic Variations in Rice with CRISPR/Cas9-Guided Hyperactive hAID Mutant*. Mol Plant, 2018. **11**(4): p. 623-626.
120. Wang, S., et al., *Precise, predictable multi-nucleotide deletions in rice and wheat using APOBEC-Cas9*. Nat Biotechnol, 2020. **38**(12): p. 1460-1465.
127. Liu, L., et al., *Developing a novel artificial rice germplasm for dinitroaniline herbicide resistance by base editing of OsTubA2*. Plant Biotechnol J, 2021. **19**(1): p. 5-7.
132. Li, Y.M., et al., *Precise base editing of non-allelic acetolactate synthase genes confers sulfonyleurea herbicide resistance in maize*. Crop Journal, 2020. **8**(3): p. 449-456.
133. Veillet, F., et al., *Transgene-Free Genome Editing in Tomato and Potato Plants Using Agrobacterium-Mediated Delivery of a CRISPR/Cas9 Cytidine Base Editor*. Int J Mol Sci, 2019. **20**(2).

134. Malabarba, J., et al., *New Strategies to Overcome Present CRISPR/Cas9 Limitations in Apple and Pear: Efficient Dechimerization and Base Editing*. Int J Mol Sci, 2020. **22**(1).
135. Kang, B.C., et al., *Precision genome engineering through adenine base editing in plants*. Nat Plants, 2018. **4**(7): p. 427-431.
137. Li, C., et al., *Expanded base editing in rice and wheat using a Cas9-adenosine deaminase fusion*. Genome Biol, 2018. **19**(1): p. 59.
138. Li, C., et al., *Targeted, random mutagenesis of plant genes with dual cytosine and adenine base editors*. Nat Biotechnol, 2020. **38**(7): p. 875-882.
139. Liu, X., et al., *A CRISPR-Cas9-mediated domain-specific base-editing screen enables functional assessment of ACCase variants in rice*. Plant Biotechnol J, 2020. **18**(9): p. 1845-1847.
142. Endo, M., et al., *Genome editing in plants by engineered CRISPR-Cas9 recognizing NG PAM*. Nat Plants, 2019. **5**(1): p. 14-17.
144. Shimatani, Z., et al., *Targeted base editing in rice and tomato using a CRISPR-Cas9 cytidine deaminase fusion*. Nat Biotechnol, 2017. **35**(5): p. 441-443.
148. Xu, R., et al., *Development of an efficient plant dual cytosine and adenine editor*. J Integr Plant Biol, 2021. **63**(9): p. 1600-1605.
176. Ren, B., et al., *A CRISPR/Cas9 toolkit for efficient targeted base editing to induce genetic variations in rice*. Sci China Life Sci, 2017. **60**(5): p. 516-519.
